# Supplementary material
Source: PubMed Central journal article supplement (PMC3993065)
Supplement: Supp_Fig2.pdf [file Supp_Fig2.pdf]

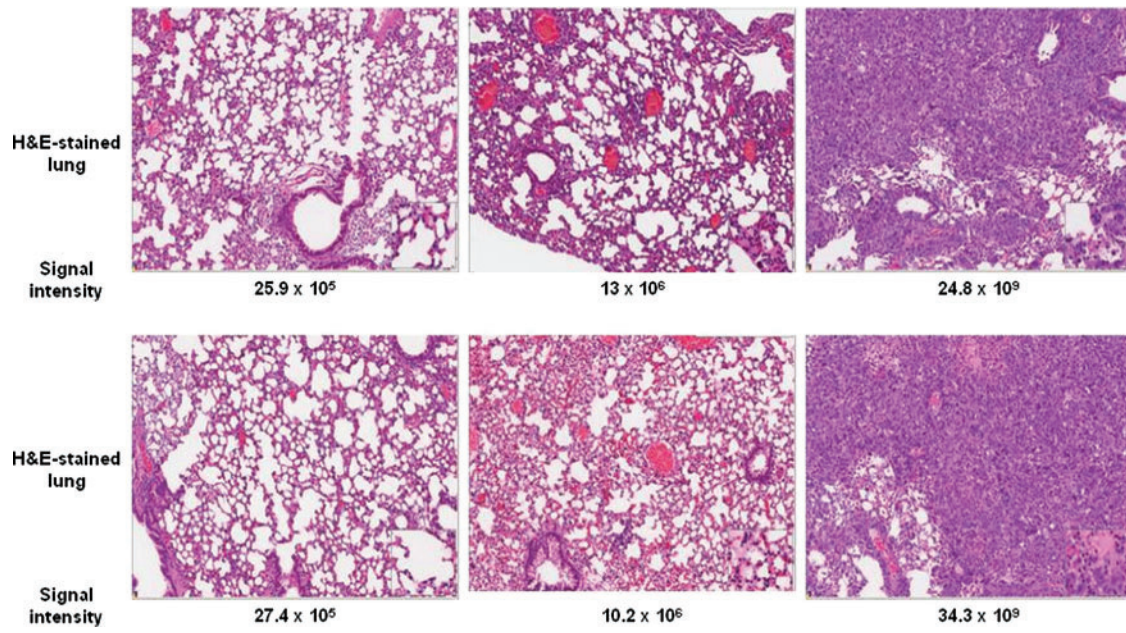

**SUPPLEMENTARY FIG. S2.** NOD.Cg-*Prkdc*<sup>scid</sup> *Il2rg*<sup>tm1Wjl</sup>/SzJ mice injected with 30,000 of 8505C-*Luc2* cells were sacrificed at different time intervals. Shown are hematoxylin and eosin (H&E)-stained lung sections and their correlating bioluminescence intensities just before euthanasia.
