# Supplementary material
Source: PubMed Central journal article supplement (PMC3993065)
Supplement: Supp_Table1.pdf [file Supp_Table1.pdf]

SUPPLEMENTARY TABLE S1. RATES AND SITES  
OF METASTASES OTHER THAN LUNG

| <i>Cell line</i>                            | <i>Mice used (n)</i> | <i>Mice with other metastasis [n (%)]</i> | <i>Other metastatic site</i> |
|---------------------------------------------|----------------------|-------------------------------------------|------------------------------|
| 8505C <sup>a</sup>                          | 45                   | 15(33%)                                   | Bone                         |
| FTC-133 <sup>a</sup>                        | 22                   | 9 (41%)                                   | Liver                        |
| C643 <sup>b</sup>                           | 8                    | 1 (12.5%)                                 | Liver                        |
| FTC-236 <sup>a</sup>                        | 5                    | 5 (100%)                                  | Liver                        |
| FTC-238 <sup>a</sup>                        | 4                    | 4 (100%)                                  | Liver                        |
| Total (all cell lines and all cell numbers) | 84                   | 34 (40.5%)                                |                              |

<sup>a</sup>Metastasis status was examined after euthanasia.

<sup>b</sup>Metastasis status was examined at the 7th week after cell injection.
